# Supplementary material for: Antimicrobial susceptibility and integrons detection among extended-spectrum β-lactamase producing Enterobacteriaceae isolates in patients with urinary tract infection
Source: PeerJ. 2023 Jun 2;11:e15429. doi: 10.7717/peerj.15429 (PMC10241164; doi:10.7717/peerj.15429)
Supplement: Supplemental Information 1 [file peerj-11-15429-s001.xlsx]

## Sheet: bas bo enterobacteriaceae 
BACTERIA	age	gender	RECURRENCE	CATHETER	TYPE UTI	AMC	CAZ	CEFOTAXIME	CRO	CEFIPIME	IMP	MEM	NIT	NA	GEN	CIP	SXT	CHRONIC DISESE	ESBL DD	ESBL CD1	ESBL CD2	VITEK	CLASS 1	CLASS 2	CLASS 3
1	51	F	1	2	1	1	1	1	1	1	1	1	2	2	2	1	1	2	1	1	1	1	1	2	1	E coli
1	37	F	2	2	2	1	1	1	1	1	1	1	1	2	2	2	2	4	1	1	1	1	1	1	1	E coli
1	44	F	2	2	2	1	1	1	1	1	1	1	1	1	1	1	1	4	1	1	1	1	1	1	1	E coli
1	58	F	2	1	2	1	2	2	2	2	2	1	2	2	1	1	2	1	2	2	2	2	1	1	1	E coli
1	50	F	2	2	1	1	1	1	1	1	1	1	2	1	2	2	2	4	2	2	1	2	2	1	1	E coli
1	28	F	2	2	1	2	1	1	1	1	1	1	1	1	1	1	2	4	2	2	1	2	2	2	1	E coli
1	33	F	2	2	2	1	2	2	2	2	1	1	2	2	2	2	2	4	2	2	2	2	2	1	1	E coli
1	30	M	1	1	2	1	2	2	2	2	1	2	1	2	1	2	2	4	2	2	1	2	1	1	1	E coli
1	40	M	1	1	4	1	2	2	2	2	1	2	2	2	1	1	2	3	2	2	2	2	1	1	1	E coli
1	25	M	1	1	2	1	2	2	2	2	2	2	2	2	2	2	2	3	2	2	2	2	2	1	1	E coli
1	55	F	2	1	2	1	2	2	2	2	1	1	2	2	2	2	2	1	2	2	1	2	1	1	1	E coli
1	49	F	2	1	4	2	2	2	2	3	1	1	1	2	3	2	3	2	1	1	1	1	1	1	1	E coli
1	48	F	2	2	2	1	2	1	1	1	1	1	2	2	2	2	1	2	2	2	1	2	2	1	1	E coli
1	75	F	1	2	2	1	2	1	2	1	1	2	2	2	2	2	2	1	2	2	2	2	1	1	1	E coli
1	33	F	2	2	1	1	2	2	2	2	1	1	1	2	2	1	1	4	2	2	2	2	2	1	1	E coli
1	55	M	2	2	2	2	2	2	2	2	1	2	1	1	1	2	2	1	2	2	2	2	2	1	1	E coli
1	24	F	2	2	1	2	2	2	2	2	1	2	2	2	2	2	2	4	2	2	1	1	2	2	1	E coli
2	39	F	2	2	1	1	2	2	2	1	1	1	2	2	2	2	2	4	2	2	2	2	2	1	1	KLEBSEILLA
1	27	F	2	2	1	1	2	2	2	2	1	1	1	2	1	2	1	4	2	2	2	2	1	2	1	E coli
2	20	F	1	2	1	1	1	1	1	1	1	2	1	2	2	1	2	4	1	1	1	1	1	1	1	KLEBSEILLA
3	66	F	2	2	2	1	2	2	2	1	1	2	2	2	2	2	2	1	2	2	2	1	2	2	1	Proteus
2	34	F	1	2	1	1	1	1	1	1	1	1	2	2	1	1	2	4	1	1	1	1	1	1	1	KLEBSEILLA
1	58	F	2	2	1	1	2	2	2	2	1	1	1	1	1	1	2	4	2	2	1	2	1	2	1	E coli
1	50	F	2	2	1	2	2	2	2	1	1	1	1	1	1	2	2	2	2	2	1	2	2	1	1	E coli
1	63	F	2	1	2	2	1	1	1	1	1	1	1	2	1	1	2	1	1	1	1	1	1	1	1	E coli
1	47	F	2	2	2	1	2	2	2	2	2	2	1	2	2	1	2	4	2	2	2	2	2	1	1	E coli
1	55	M	1	2	1	1	2	2	2	1	1	1	1	2	2	2	2	2	2	2	2	2	2	1	1	E coli
1	7	F	2	2	1	1	2	2	2	1	1	2	1	2	2	2	2	4	2	2	2	2	2	1	1	E coli
1	61	F	2	1	2	2	2	2	2	2	2	2	2	2	2	2	2	2	1	1	1	1	2	2	1	E coli
1	77	F	2	2	1	2	2	2	2	2	1	2	1	2	2	2	3	1	1	1	1	1	2	2	1	E coli
1	40	F	2	1	2	2	2	2	2	2	1	1	1	2	2	2	2	4	1	2	1	1	2	1	1	E coli
1	26	M	1	2	1	1	2	2	2	1	1	1	1	2	1	2	3	4	1	2	1	1	2	1	1	E coli
1	37	F	2	2	1	2	2	2	2	2	2	2	2	2	2	2	2	4	1	1	1	1	1	1	1	E coli
2	51	F	2	2	1	1	1	1	1	1	1	1	1	2	1	1	1	4	1	1	1	1	1	1	1	KLEBSEILLA
2	22	F	1	2	1	2	1	1	1	1	1	1	1	2	2	1	2	4	1	1	1	1	2	1	1	KLEBSEILLA
1	77	M	1	2	1	2	2	2	2	2	1	1	1	2	1	2	2	1	2	2	2	2	2	1	1	E coli
2	69	F	2	2	2	1	2	2	2	1	1	2	2	2	1	1	2	2	2	2	1	2	2	1	1	KLEBSEILLA
1	38	F	1	2	1	1	2	2	2	1	1	2	1	2	2	2	2	4	2	2	1	2	1	1	1	E coli
1	66	F	2	2	2	1	2	2	2	1	1	1	1	2	2	2	1	2	2	2	1	2	1	1	1	E coli
1	72	F	2	1	2	2	2	2	2	2	2	2	2	2	2	2	2	1	1	1	1	1	2	1	1	E coli
1	11	F	2	2	1	1	1	1	1	1	1	1	1	1	1	1	1	4	1	1	1	1	1	1	1	E coli
2	77	M	2	2	1	1	2	2	2	2	1	1	1	2	2	2	2	2	2	2	1	2	2	1	1	KLEBSEILLA
1	68	F	2	2	2	1	1	1	1	1	1	1	2	2	1	1	2	1	1	1	1	1	1	1	1	E coli
1	10	F	2	2	2	1	2	2	2	2	1	1	1	2	2	2	2	4	2	2	1	2	2	2	1	E coli
1	25	F	2	2	1	1	2	2	2	2	1	1	1	2	2	2	2	4	2	2	1	2	2	2	1	E coli
3	44	F	1	2	1	2	2	2	2	1	1	2	2	2	2	2	2	4	2	2	1	2	2	2	1	Proteus
1	40	M	1	2	1	2	2	2	2	1	1	1	1	1	2	2	2	2	2	2	1	2	2	1	1	E coli
1	66	F	2	2	1	2	1	1	1	1	1	1	1	1	1	1	1	4	1	1	1	1	1	1	1	E coli
2	65	F	1	2	1	1	2	2	2	2	1	1	1	1	1	1	2	2	2	2	1	2	2	1	1	KLEBSEILLA
1	56	F	2	1	2	2	2	2	2	2	2	2	2	2	2	2	2	2	1	1	1	1	1	1	1	E coli
1	77	F	2	2	1	2	2	2	2	2	2	2	1	2	2	2	2	1	1	1	1	1	1	1	1	E coli
2	60	M	2	2	1	1	2	1	1	1	1	1	1	1	1	1	1	2	1	1	1	1	1	1	1	KLEBSEILLA
1	34	M	1	2	1	1	2	2	2	1	1	2	2	1	2	1	2	4	2	2	1	2	2	1	1	E coli
2	44	M	1	2	1	1	2	2	2	2	1	1	1	2	2	2	2	4	2	2	1	2	1	1	1	KLEBSEILLA
1	58	F	2	2	2	1	2	2	2	2	1	1	1	2	1	1	2	1	2	2	1	2	1	1	1	E coli
1	36	M	2	1	2	2	2	2	2	1	2	2	1	2	2	2	2	4	2	2	1	2	2	2	1	E coli
1	79	F	2	1	2	1	1	1	1	1	1	1	2	2	1	2	2	2	1	1	1	1	1	1	1	E coli
2	22	F	2	2	1	1	2	1	2	1	1	1	2	1	1	1	1	4	1	1	1	1	1	1	1	KLEBSEILLA
1	81	F	2	1	2	2	2	2	2	1	1	1	1	2	1	2	2	1	2	2	1	1	2	1	1	E coli
1	55	F	1	2	1	1	1	1	1	1	1	1	1	2	1	3	3	2	1	1	1	1	1	1	1	E coli
1	67	M	1	2	1	3	1	2	2	1	1	3	1	2	3	2	1	4	2	2	1	2	1	1	1	E coli
2	76	F	1	2	2	2	2	2	2	2	1	1	1	2	2	2	2	4	1	1	1	1	1	1	1	KLEBSEILLA
1	71	F	2	1	2	2	2	2	2	2	1	1	1	1	1	1	1	4	2	2	1	2	1	1	1	E coli
1	68	M	1	2	1	2	2	2	2	2	2	2	2	2	2	2	2	1	2	2	1	2	2	1	1	E coli
1	34	F	2	2	2	3	1	1	1	1	1	3	2	2	2	3	3	4	2	1	2	2	2	1	1	E coli
1	44	F	2	2	1	1	3	3	1	2	1	2	1	3	3	2	2	4	2	2	1	2	1	1	1	E coli
1	37	M	1	2	1	1	2	2	2	1	1	3	1	2	2	3	3	4	2	2	1	2	2	1	1	E coli
2	65	M	2	1	2	1	2	2	2	1	1	1	3	2	3	2	1	1	1	1	1	1	2	1	1	KLEBSEILLA
2	70	M	2	1	4	3	1	1	3	1	1	1	1	2	1	1	1	2	1	1	1	1	2	1	1	KLEBSEILLA
1	45	F	2	2	1	2	2	2	2	2	3	2	2	2	2	2		2	1	1	1	1	2	1	1	E coli
2	45	F	1	2	1	1	2	2	2	1	1	1	1	2	1	2	2	4	2	2	1	2	2	1	1	KLEBSEILLA
2	65	F	2	2	1	2	2	2	2	2	1	2	2	2	1	2	2	2	1	1	1	1	2	1	1	KLEBSEILLA
1	79	M	1	1	4	1	1	1	1	1	1	1	1	1	1	1	2	1	2	2	1	2	1	2	1	E coli
2	55	F	1	2	1	1	2	2	3	1	1	3	1	2	3	3	1	1	2	2	1	2	2	1	1	KLEBSEILLA
1	64	M	1	2	2	2	2	2	2	2	2	2	2	2	2	2	2	2	1	1	1	1	2	1	1	E coli
2	13	F	1	2	1	2	2	2	2	2	1	1	1	2	1	1	1	4	2	2	1	2	1	1	1	KLEBSEILLA
1	23	F	2	2	1	1	2	2	2	2	1	1	2	2	1	1	1	4	2	2	2	2	1	1	1	E coli
1	56	F	1	2	1	1	2	2	2	2	1	1	1	1	1	1	2	1	2	2	1	2	1	1	1	E coli
1	47	M	1	2	3	1	2	2	2	1	1	1	1	2	1	3	3	4	1	1	1	1	2	1	1	E coli
1	11	F	1	2	1	1	1	2	2	1	1	1	1	3	1	1	1	4	1	1	1	1	2	2	1	E coli
1	33	F	1	2	1	3	1	1	3	1	1	1	1	3	3	1	3	4	2	2	1	2	2	1	1	E coli
2	72	F	2	1	2	2	2	2	2	2	1	1	1	2	2	2	2	1	2	2	1	2	1	1	1	KLEBSEILLA
1	56	M	1	2	3	2	2	2	2	2	1	2	2	2	1	2	2	2	2	2	1	2	2	1	1	E coli
1	68	F	2	1	2	2	2	2	2	2	2	2	2	2	2	2	2	1	2	2	1	2	2	1	1	E coli
1	62	M	2	2	3	2	2	2	2	2	1	1	1	2	2	2	2	4	1	1	1	1	2	1	1	E coli
1	51	F	1	2	1	2	2	1	1	1	1	1	1	2	1	1	1	4	2	2	1	2	2	1	1	E coli
1	49	F	2	2	2	1	2	3	2	2	1	1	1	2	1	1	1	4	2	2	2	2	2	1	1	E coli
2	56	F	2	1	2	3	3	2	2	1	1	1	1	2	3	3	3	1	2	2	1	2	2	1	1	KLEBSEILLA
1	36	M	1	1	3	3	1	2	2	1	1	1	1	1	2	3	2	4	2	2	1	2	2	2	1	E coli
1	48	M	1	2	3	2	2	2	2	2	1	1	1	2	1	2	2	4	1	1	1	1	1	1	1	E coli
1	81	F	2	1	2	1	2	2	2	2	1	1	2	2	1	1	2	1	2	2	1	2	1	1	1	E coli
1	47	F	2	2	1	1	2	2	2	1	1	1	1	2	1	1	2	4	2	2	1	2	1	1	1	E coli
2	33	M	1	2	3	1	2	2	2	1	1	1	1	2	2	1	2	4	1	1	1	1	1	1	1	KLEBSEILLA
1	55	F	1	2	1	2	2	1	1	1	1	1	1	2	1	2	2	4	2	2	1	2	2	2	1	E coli
1	77	M	1	1	3	2	2	2	2	1	1	1	1	2	1	2	2	2	1	1	1	1	1	1	1	E coli
2	51	M	1	2	3	2	1	1	1	1	1	1	1	1	1	1	1	4	1	1	1	1	1	1	1	KLEBSEILLA
2	58	F	2	1	2	2	2	2	2	2	1	2	2	2	2	2	2	4	1	1	1	1	2	2	1	KLEBSEILLA
2	77	F	2	2	1	2	2	1	2	2	1	1	1	1	1	2	1	2	1	1	1	1	1	1	1	KLEBSEILLA
2	49	F	2	2	2	2	2	2	2	2	2	2	2	2	1	2	2	2	1	1	1	1	1	1	1	KLEBSEILLA
2	23	M	1	2	2	2	2	2	2	2	1	1	2	2	2	2	2	4	2	2	1	2	1	1	1	KLEBSEILLA
2	80	M	1	1	3	2	2	2	2	2	1	1	2	2	2	2	2	1	1	1	1	1	2	1	1	KLEBSEILLA
2	74	F	2	2	1	2	2	2	2	2	2	2	2	2	2	2	2	2	1	1	1	1	1	1	1	KLEBSEILLA
2	84	M	1	2	3	2	2	2	2	1	1	1	1	2	1	1	2	1	1	1	1	1	2	2	1	KLEBSEILLA
1	63	M	1	2	3	2	2	2	2	2	1	2	2	2	2	2	2	1	1	1	1	1	2	2	1	E coli
2	14	M	1	2	1	1	3	2	2	1	1	1	1	1	3	3	1	4	2	2	2	2	2	1	1	KLEBSEILLA
1	44	F	2	2	1	2	2	2	2	2	1	1	1	2	1	1	2	2	1	1	1	1	2	1	1	E coli
1	66	F	2	2	2	2	2	2	2	2	2	2	2	2	2	2	2	1	1	1	1	1	1	1	1	E coli
1	80	M	2	1	1	1	1	1	1	1	1	1	1	2	1	1	2	1	1	1	1	1	2	1	1	E coli
2	31	F	1	2	1	2	1	1	1	1	1	1	1	1	1	1	1	4	2	2	1	2	1	1	1	KLEBSEILLA
1	51	F	2	2	2	2	2	2	2	2	1	1	2	2	1	2	2	1	2	2	1	2	2	1	1	E coli
1	77	M	2	1	1	2	2	2	2	2	1	1	1	2	1	2	2	1	1	2	1	2	2	1	1	E coli
1	65	M	1	2	1	2	2	3	3	1	1	3	2	2	2	2	2	1	1	1	1	1	2	1	1	E coli
1	70	F	2	2	1	3	2	2	2	1	1	1	1	3	2	3	2	2	2	2	1	2	1	1	1	E coli
1	70	F	2	2	1	1	3	2	2	1	1	3	1	2	3	2	2	1	1	1	1	1	2	1	1	E coli
1	33	F	1	2	1	2	1	1	2	1	2	1	1	1	1	1	2	1	1	1	1	1	1	1	1	E coli
2	64	F	2	1	2	2	2	1	2	1	1	1	1	2	1	1	2	1	1	1	1	1	2	1	1	KLEBSEILLA
1	35	F	1	2	1	1	2	2	2	1	1	1	1	2	1	1	1	4	1	1	1	1	1	1	1	E coli
1	14	F	1	2	1	2	1	1	1	1	1	1	1	2	1	1	2	4	2	2	1	2	1	1	1	E coli
1	71	F	2	2	2	1	2	2	2	2	1	1	1	2	1	2	2	2	2	2	2	2	2	1	1	E coli
1	82	M	2	1	1	2	2	2	2	2	1	1	2	2	1	2	2	4	1	1	1	1	1	1	1	E coli

## Sheet: ESBL W INTEGRONS
BACTERIAL NAME	ESBL by DD	ESBL by CD1	ESBL by CD2	ESBL by VITEK		CLASS 1	CLASS 2	CLASS 3
E coli	1	1	1	1	E coli	negative	positive	negative
E coli	1	1	1	1	E coli	negative	negative	negative
E coli	1	1	1	1	E coli	negative	negative	negative
E coli	2	2	2	2	E coli	negative	negative	negative
E coli	2	2	1	2	E coli	positive	negative	negative
E coli	2	2	1	2	E coli	positive	positive	negative
E coli	2	2	2	2	E coli	positive	negative	negative
E coli	2	2	1	2	E coli	negative	negative	negative
E coli	2	2	2	2	E coli	negative	negative	negative
E coli	2	2	2	2	E coli	positive	negative	negative
E coli	2	2	1	2	E coli	negative	negative	negative
E coli	1	1	1	1	E coli	negative	negative	negative
E coli	2	2	1	2	E coli	positive	negative	negative
E coli	2	2	2	2	E coli	negative	negative	negative
E coli	2	2	2	2	E coli	positive	negative	negative
E coli	2	2	2	2	E coli	positive	negative	negative
E coli	2	2	1	1	E coli	positive	positive	negative
KLEBSEILLA	2	2	2	2	KLEBSEILLA	positive	negative	negative
E coli	2	2	2	2	E coli	negative	positive	negative
KLEBSEILLA	1	1	1	1	KLEBSEILLA	negative	negative	negative
Proteus	2	2	2	1	Proteus	positive	positive	negative
KLEBSEILLA	1	1	1	1	KLEBSEILLA	negative	negative	negative
E coli	2	2	1	2	E coli	negative	positive	negative
E coli	2	2	1	2	E coli	positive	negative	negative
E coli	1	1	1	1	E coli	negative	negative	negative
E coli	2	2	2	2	E coli	positive	negative	negative
E coli	2	2	2	2	E coli	positive	negative	negative
E coli	2	2	2	2	E coli	positive	negative	negative
E coli	1	1	1	1	E coli	positive	positive	negative
E coli	1	1	1	1	E coli	positive	positive	negative
E coli	1	2	1	1	E coli	positive	negative	negative
E coli	1	2	1	1	E coli	positive	negative	negative
E coli	1	1	1	1	E coli	negative	negative	negative
KLEBSEILLA	1	1	1	1	KLEBSEILLA	negative	negative	negative
KLEBSEILLA	1	1	1	1	KLEBSEILLA	positive	positive	negative
E coli	2	2	2	2	E coli	positive	negative	negative
KLEBSEILLA	2	2	1	2	KLEBSEILLA	positive	negative	negative
E coli	2	2	1	2	E coli	negative	negative	negative
E coli	2	2	1	2	E coli	negative	negative	negative
E coli	1	1	1	1	E coli	positive	negative	negative
E coli	1	1	1	1	E coli	negative	negative	negative
KLEBSEILLA	2	2	1	2	KLEBSEILLA	positive	negative	negative
E coli	1	1	1	1	E coli	negative	negative	negative
E coli	2	2	1	2	E coli	positive	positive	negative
E coli	2	2	1	2	E coli	positive	positive	negative
Proteus	2	2	1	2	Proteus	positive	positive	negative
E coli	2	2	1	2	E coli	positive	negative	negative
E coli	1	1	1	1	E coli	negative	negative	negative
KLEBSEILLA	2	2	1	2	KLEBSEILLA	positive	negative	negative
E coli	1	1	1	1	E coli	negative	negative	negative
E coli	1	1	1	1	E coli	negative	negative	negative
KLEBSEILLA	1	1	1	1	KLEBSEILLA	negative	negative	negative
E coli	2	2	1	2	E coli	positive	negative	negative
KLEBSEILLA	2	2	1	2	KLEBSEILLA	negative	negative	negative
E coli	2	2	1	2	E coli	negative	negative	negative
E coli	2	2	1	2	E coli	positive	positive	negative
E coli	1	1	1	1	E coli	negative	negative	negative
KLEBSEILLA	1	1	1	1	KLEBSEILLA	negative	negative	negative
E coli	2	2	1	1	E coli	positive	negative	negative
E coli	1	1	1	1	E coli	negative	negative	negative
E coli	2	2	1	2	E coli	negative	negative	negative
KLEBSEILLA	1	1	1	1	KLEBSEILLA	negative	negative	negative
E coli	2	2	1	2	E coli	negative	negative	negative
E coli	2	2	1	2	E coli	positive	negative	negative
E coli	2	1	2	2	E coli	positive	negative	negative
E coli	2	2	1	2	E coli	negative	negative	negative
E coli	2	2	1	2	E coli	positive	negative	negative
KLEBSEILLA	1	1	1	1	KLEBSEILLA	positive	negative	negative
KLEBSEILLA	1	1	1	1	KLEBSEILLA	positive	negative	negative
E coli	1	1	1	1	E coli	positive	negative	negative
KLEBSEILLA	2	2	1	2	KLEBSEILLA	positive	negative	negative
KLEBSEILLA	1	1	1	1	KLEBSEILLA	positive	negative	negative
E coli	2	2	1	2	E coli	negative	positive	negative
KLEBSEILLA	2	2	1	2	KLEBSEILLA	positive	negative	negative
E coli	1	1	1	1	E coli	positive	negative	negative
KLEBSEILLA	2	2	1	2	KLEBSEILLA	negative	negative	negative
E coli	2	2	2	2	E coli	negative	negative	negative
E coli	2	2	1	2	E coli	negative	negative	negative
E coli	1	1	1	1	E coli	positive	negative	negative
E coli	1	1	1	1	E coli	positive	positive	negative
E coli	2	2	1	2	E coli	positive	negative	negative
KLEBSEILLA	2	2	1	2	KLEBSEILLA	negative	negative	negative
E coli	2	2	1	2	E coli	positive	negative	negative
E coli	2	2	1	2	E coli	positive	negative	negative
E coli	1	1	1	1	E coli	positive	negative	negative
E coli	2	2	1	2	E coli	positive	negative	negative
E coli	2	2	2	2	E coli	positive	negative	negative
KLEBSEILLA	2	2	1	2	KLEBSEILLA	positive	negative	negative
E coli	2	2	1	2	E coli	positive	positive	negative
E coli	1	1	1	1	E coli	negative	negative	negative
E coli	2	2	1	2	E coli	negative	negative	negative
E coli	2	2	1	2	E coli	negative	negative	negative
KLEBSEILLA	1	1	1	1	KLEBSEILLA	negative	negative	negative
E coli	2	2	1	2	E coli	positive	positive	negative
E coli	1	1	1	1	E coli	negative	negative	negative
KLEBSEILLA	1	1	1	1	KLEBSEILLA	negative	negative	negative
KLEBSEILLA	1	1	1	1	KLEBSEILLA	positive	positive	negative
KLEBSEILLA	1	1	1	1	KLEBSEILLA	negative	negative	negative
KLEBSEILLA	1	1	1	1	KLEBSEILLA	negative	negative	negative
KLEBSEILLA	2	2	1	2	KLEBSEILLA	negative	negative	negative
KLEBSEILLA	1	1	1	1	KLEBSEILLA	positive	negative	negative
KLEBSEILLA	1	1	1	1	KLEBSEILLA	negative	negative	negative
KLEBSEILLA	1	1	1	1	KLEBSEILLA	positive	positive	negative
E coli	1	1	1	1	E coli	positive	positive	negative
KLEBSEILLA	2	2	2	2	KLEBSEILLA	positive	negative	negative
E coli	1	1	1	1	E coli	positive	negative	negative
E coli	1	1	1	1	E coli	negative	negative	negative
E coli	1	1	1	1	E coli	positive	negative	negative
KLEBSEILLA	2	2	1	2	KLEBSEILLA	negative	negative	negative
E coli	2	2	1	2	E coli	positive	negative	negative
E coli	1	2	1	2	E coli	positive	negative	negative
E coli	1	1	1	1	E coli	positive	negative	negative
E coli	2	2	1	2	E coli	negative	negative	negative
E coli	1	1	1	1	E coli	positive	negative	negative
E coli	1	1	1	1	E coli	negative	negative	negative
KLEBSEILLA	1	1	1	1	KLEBSEILLA	positive	negative	negative
E coli	1	1	1	1	E coli	negative	negative	negative
E coli	2	2	1	2	E coli	negative	negative	negative
E coli	2	2	2	2	E coli	positive	negative	negative
E coli	1	1	1	1	E coli	negative	negative	negative

## Sheet: TANHA BO ESBL POSITIVE 
NOMBER	ESBL POSITIVE	INTL 1	INTL 2	INTL 3
4	E coli	negative	negative	negative
5	E coli	positive	negative	negative
6	E coli	positive	positive	negative
7	E coli	positive	negative	negative
8	E coli	negative	negative	negative
9	E coli	negative	negative	negative
10	E coli	positive	negative	negative
11	E coli	negative	negative	negative
13	E coli	positive	negative	negative
14	E coli	negative	negative	negative
15	E coli	positive	negative	negative
16	E coli	positive	negative	negative
17	E coli	positive	positive	negative
18	Klebsiella	positive	negative	negative
19	E coli	negative	positive	negative
21	Proteus	positive	positive	negative
23	E coli	negative	positive	negative
24	E coli	positive	negative	negative
26	E coli	positive	negative	negative
27	E coli	positive	negative	negative
28	E coli	positive	negative	negative
31	E coli	positive	negative	negative
37	Klebsiella	positive	negative	negative
38	E coli	negative	negative	negative
39	E coli	negative	negative	negative
42	Klebsiella	positive	negative	negative
44	E coli	positive	positive	negative
45	E coli	positive	positive	negative
46	Proteus	positive	positive	negative
47	E coli	positive	negative	negative
49	Klebsiella	positive	negative	negative
53	E coli	positive	negative	negative
54	E coli	negative	negative	negative
55	E coli	negative	negative	negative
56	E coli	positive	positive	negative
59	E coli	positive	negative	negative
61	E coli	negative	negative	negative
64	Klebsiella	positive	negative	negative
65	E coli	positive	negative	negative
66	E coli	negative	negative	negative
67	E coli	positive	negative	negative
68	E coli	positive	negative	negative
72	Klebsiella	positive	negative	negative
74	E coli	positive	negative	negative
75	Klebsiella	positive	negative	negative
77	Klebsiella	negative	negative	negative
78	E coli	negative	negative	negative
79	E coli	positive	negative	negative
82	E coli	negative	negative	negative
83	Klebsiella	positive	negative	negative
84	E coli	positive	negative	negative
85	E coli	positive	negative	negative
87	E coli	positive	negative	negative
88	E coli	positive	negative	negative
89	Klebsiella	positive	positive	negative
90	E coli	negative	negative	negative
92	E coli	negative	negative	negative
93	E coli	negative	negative	negative
95	E coli	negative	negative	negative
101	Klebsiella	positive	negative	negative
106	Klebsiella	positive	negative	negative
110	Klebsiella	positive	negative	negative
111	E coli	positive	negative	negative
114	E coli	positive	negative	negative
119	E coli	positive	negative	negative
120	E coli	negative	negative	negative
	E coli	negative	positive	negative
	E coli	negative	positive	negative

## Sheet: bo 400 sample
bacteria	chronic disease	catheter	hospitalization	type UTI	RECURRENCE	gender	age
1	2	2	1	1	NO	1	51
1	4	2	1	2	YES	2	37
1	4	2	1	2	YES	2	44			gender	male =1
1	1	1	1	2	YES	2	58				female=2
1	4	2	1	1	YES	2	50			CATHETER	1= YES
1	4	2	1	1	YES	2	28				2= NO
1	4	2	1	2	YES	2	33
1	4	1	2	2	NO	2	30			HOSPITALIZATION	1=OUT PATIENTS
1	3	1	2	4	NO	1	40				2= INPATIENTS
1	3	1	2	2	NO	2	25
1	1	1	2	2	YES	1	55
1	2	1	2	4	YES	2	49
1	2	2	1	2	YES	1	48			type of UTI	cystitis =1
1	1	2	1	2	NO	2	75				pylonephritis=2
1	4	2	2	1	YES	1	33				Urethritis=3
1	1	2	1	2	YES	2	55				prostatis=4
1	4	2	1	1	YES	1	24
2	4	2	1	1	YES	2	39
1	4	2	1	1	YES	1	27			bacteria	E coli =1
2	4	2	1	1	NO	1	20				Klebsiella =2
3	1	2	1	2	YES	2	66				proteus=3
2	4	2	1	1	NO	1	34				pseudomonas=4
1	4	2	1	1	YES	2	58				acinatobacter=5
1	2	2	1	1	YES	2	50				fungus =6
1	1	1	2	2	YES	2	63				gramposiive =7
1	4	2	1	2	YES	2	47				no growth =8
1	2	2	1	1	NO	2	55
1	4	2	2	1	YES	2	77
1	2	1	2	2	YES	2	61
1	1	2	2	1	YES	2	77
1	4	1	2	2	YES	1	40
1	4	2	1	1	NO	2	26
1	4	2	1	1	YES	2	37
2	4	2	1	1	YES	1	51
2	4	2	1	1	NO	2	22
1	1	2	1	1	NO	2	77
2	2	2	1	2	YES	1	69
1	4	2	1	1	NO	1	38
1	2	2	1	2	YES	2	66
1	1	1	2	2	YES	2	72
1	4	2	1	1	YES	2	11
2	2	2	1	1	YES	2	77
1	1	2	1	2	YES	2	68
1	4	2	1	2	YES	2	10
1	4	2	2	1	YES	2	25
3	4	2	1	1	NO	2	44
1	2	2	1	1	NO	2	40
1	4	2	1	1	YES	2	66
2	2	2	1	1	NO	1	65
1	2	1	2	2	YES	1	56
1	1	2	1	1	YES	2	77
2	2	2	2	1	YES	1	60
1	4	2	1	1	NO	2	34
2	4	2	2	1	NO	1	44
1	1	2	1	2	YES	2	58
1	4	1	2	2	YES	1	36
1	2	1	2	2	YES	2	79
2	4	2	1	1	YES	1	22
1	1	1	2	2	YES	2	81
1	2	2	1	1	NO	1	55
1	4	2	1	1	NO	2	67
2	4	2	1	2	NO	2	76
1	4	1	2	2	YES	2	71
1	1	2	2	1	NO	2	68
1	4	2	1	2	YES	2	34
1	4	2	1	1	YES	2	44
1	4	2	1	1	NO	2	37
2	1	1	2	2	YES	2	65
2	2	1	2	4	YES	1	70
1	2	2	1	1	YES	2	45
2	4	2	1	1	NO	1	45
2	2	2	2	1	YES	2	65
1	1	1	2	4	NO	2	79
2	1	2	2	1	NO	1	55
1	2	2	1	2	NO	2	64
2	4	2	1	1	NO	1	13
1	4	2	2	1	YES	2	23
1	1	2	1	1	NO	2	56
1	4	2	1	3	NO	1	47
1	4	2	1	1	NO	1	11
1	4	2	1	1	NO	2	33
2	1	1	2	2	YES	2	72
1	2	2	1	3	NO	1	56
1	1	1	2	2	YES	1	68
1	4	2	1	3	YES	1	62
1	4	2	2	1	NO	2	51
1	4	2	1	2	YES	1	49
2	1	1	2	2	YES	2	56
1	4	1	2	3	NO	2	36
1	4	2	1	3	NO	2	48
1	1	1	2	2	YES	2	81
1	4	2	1	1	YES	2	47
2	4	2	1	3	NO	2	33
1	4	2	1	1	NO	1	55
1	2	1	2	3	NO	2	77
2	4	2	1	3	NO	1	51
2	4	1	2	2	YES	2	58
2	2	2	1	1	YES	1	77
2	2	2	1	2	YES	2	49
2	4	2	1	2	NO	1	23
2	1	1	2	3	NO	2	80
2	2	2	1	1	YES	2	74
2	1	2	1	3	NO	2	84
1	1	2	2	3	NO	2	63
2	4	2	1	1	NO	1	14
1	2	2	2	1	YES	2	44
1	1	2	2	2	YES	2	66
1	1	1	2	1	YES	2	80
2	4	2	2	1	NO	2	31
1	1	2	2	2	YES	2	51
1	1	1	2	1	YES	2	77
1	1	2	2	1	NO	2	65
1	2	2	2	1	YES	2	70
1	1	2	1	1	YES	2	70
1	1	2	1	1	NO	2	33
2	1	1	2	2	YES	2	64
1	4	2	2	1	NO	2	35
1	4	2	2	1	NO	2	14
1	2	2	1	2	YES	2	71
1	4	1	2	1	YES	2	82
4	1	1	2	2	YES	1	55
4	1	1	2	2	YES	1	45
4	1	1	2	2	YES	2	47
4	1	1	2	2	NO	2	49
4	4	1	2	2	NO	2	59
4	3	1	2	2	NO	1	54
4	3	1	2	2	YES	2	53
4	3	1	2	2	YES	2	50
4	3	2	2	2	NO	2	48
4	3	2	2	2	NO	2	46
4	3	2	1	2	NO	1	59
4	2	2	1	2	YES	2	51
4	2	2	1	2	NO	2	33
4	2	1	2	2	YES	2	34
4	2	2	2	2	YES	2	23
5	3	2	2	2	YES	1	13
5	2	1	2	2	NO	2	18
5	3	1	2	2	NO	2	34
5	3	1	2	2	NO	2	53
5	3	1	2	2	YES	2	82
5	1	1	2	1	NO	1	66
5	3	1	2	1	NO	2	65
5	2	1	2	1	YES	2	37
5	2	2	2	1	NO	2	67
6	2	1	2	1	NO	2	43
6	1	1	2	1	YES	2	17
6	1	1	2	1	NO	2	23
6	1	1	2	1	YES	2	23
6	1	1	2	1	NO	1	29
6	2	1	2	1	NO	1	34
6	3	1	2	1	NO	2	54
6	3	1	2	1	NO	2	71
6	3	1	2	1	YES	2	66
6	2	1	2	1	YES	2	72
6	2	2	2	1	YES	2	9
7	3	2	1	2	NO	2	62
7	1	1	2	2	YES	2	62
7	1	1	2	2	YES	1	34
7	3	1	2	2	YES	2	72
7	3	1	2	2	YES	2	48
7	3	2	1	2	YES	2	57
7	3	2	1	2	NO	2	77
7	2	2	2	2	YES	2	10
7	2	2	2	2	NO	2	45
7	4	2	2	2	YES	2	65
7	2	2	1	2	NO	2	77
7	4	2	2	2	NO	2	81
7	4	2	2	2	NO	2	74
7	4	2	1	2	NO	2	32
7	4	2	1	4	NO	1	37
7	2	2	1	4	YES	2	49
8	1	2	1	2	YES	2	55
8	1	2	2	2	YES	2	22
8	1	2	2	2	YES	2	20
8	1	2	2	2	YES	2	40
8	1	2	2	2	NO	2	16
8	1	2	2	2	NO	1	37
8	1	2	2	2	YES	1	38
8	1	1	2	2	YES	1	83
8	1	1	2	2	YES	2	43
8	1	1	2	2	YES	1	52
8	1	1	2	2	YES	2	9
8	1	1	2	2	YES	2	23
8	1	1	2	2	NO	2	52
8	1	1	2	3	NO	2	43
8	1	1	2	3	NO	2	77
8	1	2	2	3	NO	2	57
8	1	2	2	3	NO	1	83
8	1	2	2	3	NO	2	14
8	1	2	2	4	NO	2	47
8	1	2	2	2	NO	2	19
8	1	2	2	2	NO	1	21
8	1	2	1	2	NO	2	64
8	1	2	1	2	NO	2	54
8	1	2	1	2	NO	1	43
8	1	2	1	2	NO	1	38
8	1	2	1	2	NO	2	23
8	1	2	1	2	NO	2	57
8	1	2	1	2	NO	2	51
8	1	2	1	2	NO	2	32
8	1	2	1	2	NO	2	37
8	1	2	1	2	NO	2	38
8	1	2	1	2	NO	2	48
8	1	2	1	2	NO	2	58
8	1	2	1	2	NO	2	11
8	1	2	1	3	YES	2	48
8	1	2	1	3	YES	1	34
8	1	2	1	3	YES	1	46
8	1	2	1	3	YES	2	65
8	1	2	1	3	YES	2	54
8	1	2	1	3	YES	2	22
8	1	2	1	3	NO	2	29
8	1	2	1	3	NO	2	28
8	1	2	1	3	NO	2	54
8	1	2	1	3	NO	2	32
8	1	2	1	3	NO	1	83
8	1	2	1	3	NO	2	79
8	1	2	1	3	NO	2	70
8	1	2	1	3	NO	1	48
8	1	2	1	2	NO	2	87
8	1	2	1	3	NO	1	61
8	1	2	1	2	NO	2	62
8	1	2	1	2	NO	2	34
8	1	2	1	2	NO	2	33
8	1	2	1	2	NO	2	20
8	1	2	1	2	NO	1	21
8	1	2	1	2	NO	2	76
8	1	2	1	2	NO	1	74
8	1	2	1	2	NO	2	47
8	1	2	1	2	NO	2	13
8	1	2	1	2	NO	2	10
8	1	2	1	2	NO	2	35
8	1	2	1	2	NO	2	49
8	1	2	1	2	NO	2	46
8	1	2	1	2	NO	2	56
8	1	2	1	2	NO	2	66
8	1	2	1	2	NO	2	67
8	1	2	1	2	YES	1	71
8	1	2	1	2	YES	2	32
8	1	2	1	2	NO	2	55
8	1	2	1	2	NO	2	61
8	1	2	1	3	NO	1	60
8	1	2	1	3	NO	1	19
8	1	2	1	3	NO	2	72
8	1	2	1	3	NO	2	39
8	1	2	1	3	NO	2	44
8	1	2	1	3	NO	2	38
8	1	2	1	3	NO	2	45
8	1	2	1	3	NO	1	65
8	1	2	1	3	NO	1	22
8	1	2	1	3	NO	1	48
8	1	2	1	3	NO	1	42
8	1	2	1	1	NO	2	78
8	1	2	1	1	NO	2	46
8	1	2	1	1	NO	2	43
8	1	2	1	1	NO	2	77
8	1	2	1	1	NO	2	57
8	1	2	1	1	NO	2	9
8	1	2	1	1	NO	2	56
8	1	2	1	1	NO	2	66
8	1	2	1	1	NO	1	67
8	1	2	1	1	NO	1	68
8	4	2	1	1	NO	2	69
8	4	2	1	1	NO	2	67
8	4	2	1	1	NO	1	59
8	4	2	1	1	NO	2	53
8	4	2	1	1	NO	1	17
8	4	2	1	1	NO	2	23
8	4	2	1	1	NO	2	28
8	4	2	1	1	NO	2	29
8	2	2	1	1	NO	2	27
8	2	2	1	1	NO	2	14
8	2	2	1	1	NO	2	56
8	2	2	1	1	NO	2	34
8	2	2	1	1	NO	2	88
8	2	2	1	1	NO	2	81
8	2	2	1	1	NO	2	59
8	2	2	1	1	NO	2	50
8	2	2	1	1	NO	2	62
8	2	2	1	1	NO	2	64
8	2	2	1	3	NO	2	70
8	2	2	1	1	NO	1	30
8	2	2	1	1	NO	2	19
8	2	2	1	1	NO	1	44
8	2	2	1	1	NO	2	51
8	4	2	1	1	NO	2	32
8	2	2	1	1	NO	2	43
8	2	2	1	1	NO	2	59
8	2	2	1	1	NO	2	65
8	2	2	1	1	NO	2	75
8	2	2	1	1	NO	1	78
8	2	2	1	1	NO	2	79
8	2	2	1	1	NO	2	69
8	2	2	1	1	NO	2	69
8	2	2	1	1	NO	2	63
8	2	2	1	1	NO	2	40
8	3	2	1	1	NO	1	55
8	4	2	1	1	NO	2	51
8	4	2	1	1	NO	2	69
8	4	2	1	1	NO	2	37
8	4	2	1	1	NO	2	47
8	4	2	1	1	NO	2	41
8	4	2	1	1	NO	2	37
8	4	2	1	1	NO	2	83
8	4	2	1	1	NO	1	79
8	4	2	1	1	NO	2	33
8	4	2	1	1	NO	1	59
8	4	2	1	1	NO	2	45
8	4	2	1	1	NO	2	47
8	4	2	1	1	NO	1	49
8	4	2	1	1	NO	2	53
8	4	2	1	1	NO	2	52
8	4	2	1	1	NO	2	50
8	4	2	1	1	NO	2	33
8	4	2	1	1	NO	2	19
8	4	2	1	1	NO	1	55
8	4	2	1	1	NO	2	14
8	4	2	1	1	NO	2	34
8	4	2	1	1	NO	1	55
8	4	2	1	1	NO	2	35
8	4	2	1	1	NO	2	87
8	4	2	1	1	NO	2	23
8	4	2	1	1	NO	2	44
8	4	2	1	1	NO	2	55
8	4	2	1	1	NO	2	57
8	4	2	1	1	NO	2	76
8	4	2	1	1	NO	2	11
8	4	2	1	1	NO	1	65
8	4	2	1	1	NO	2	43
8	4	2	1	1	NO	2	55
8	4	2	1	1	NO	2	23
8	4	2	1	1	NO	2	76
8	4	2	1	1	NO	2	47
8	4	2	1	1	NO	1	65
8	4	2	1	1	NO	1	29
8	4	2	1	1	NO	2	59
8	4	2	1	1	NO	2	13
8	4	2	1	1	NO	2	45
8	4	2	1	1	NO	2	65
8	4	2	1	1	NO	2	44
8	4	2	1	1	NO	1	38
8	4	2	1	1	NO	2	42
8	4	2	1	1	NO	2	55
8	4	2	1	1	NO	2	47
8	4	2	1	1	NO	2	29
8	4	2	1	1	NO	1	30
8	4	2	1	1	NO	2	43
8	4	2	1	1	NO	2	74
8	4	2	1	1	NO	1	67
8	4	2	1	1	NO	2	81
8	4	2	1	1	NO	2	38
8	4	2	1	1	NO	2	36
8	4	2	1	1	NO	1	54
8	4	2	1	1	NO	1	67
8	4	2	1	1	NO	1	87
8	4	2	1	1	NO	1	9
8	4	2	1	1	NO	1	88
8	4	2	1	1	NO	1	39
8	4	2	1	1	NO	1	49
8	4	2	1	1	NO	2	59
8	4	2	1	1	NO	1	43
8	4	2	1	1	NO	2	73
8	4	2	1	1	NO	1	33
8	4	2	1	1	NO	1	44
8	4	2	1	1	NO	1	55
8	4	2	1	1	NO	2	66
8	4	2	1	1	NO	1	64	76
8	4	2	1	1	YES	1	34
8	4	2	1	1	YES	1	45
8	2	2	1	1	NO	1	56
8	2	2	1	1	NO	1	67
8	1	2	1	1	NO	2	33
8	1	2	1	1	NO	2	72
8	1	2	1	1	NO	1	63
8	1	2	1	1	NO	1	54
8	1	2	1	1	NO	1	43
8	4	2	1	1	NO	1	32
8	4	2	1	1	NO	2	69
8	4	2	1	1	NO	1	38
8	4	2	1	1	NO	2	47
8	4	2	1	1	NO	1	65
8	4	2	1	1	NO	1	67
8	4	2	1	1	NO	1	78
8	4	2	1	1	NO	1	89
8	4	2	1	1	NO	1	87
8	4	2	1	1	NO	1	75
8	4	2	1	1	NO	1	44
8	4	2	1	1	NO	1	36
8	4	2	1	1	NO	1	47
8	4	2	1	1	YES	2	67
8	4	2	1	1	NO	2	83
8	4	2	1	1	NO	2	14
8	4	2	1	1	NO	1	44
8	4	2	1	1	YES	1	62
8	4	2	1	1	NO	1	66
8	4	2	1	1	YES	1	77
8	4	2	1	1	YES	1	66
8	4	2	1	1	YES	1	64
8	4	2	1	1	YES	1	33
8	2	2	1	1	YES	1	40
